FEBRUARY 2016 | VOLUME 67 | NUMBER 2

# Psychiatric Services

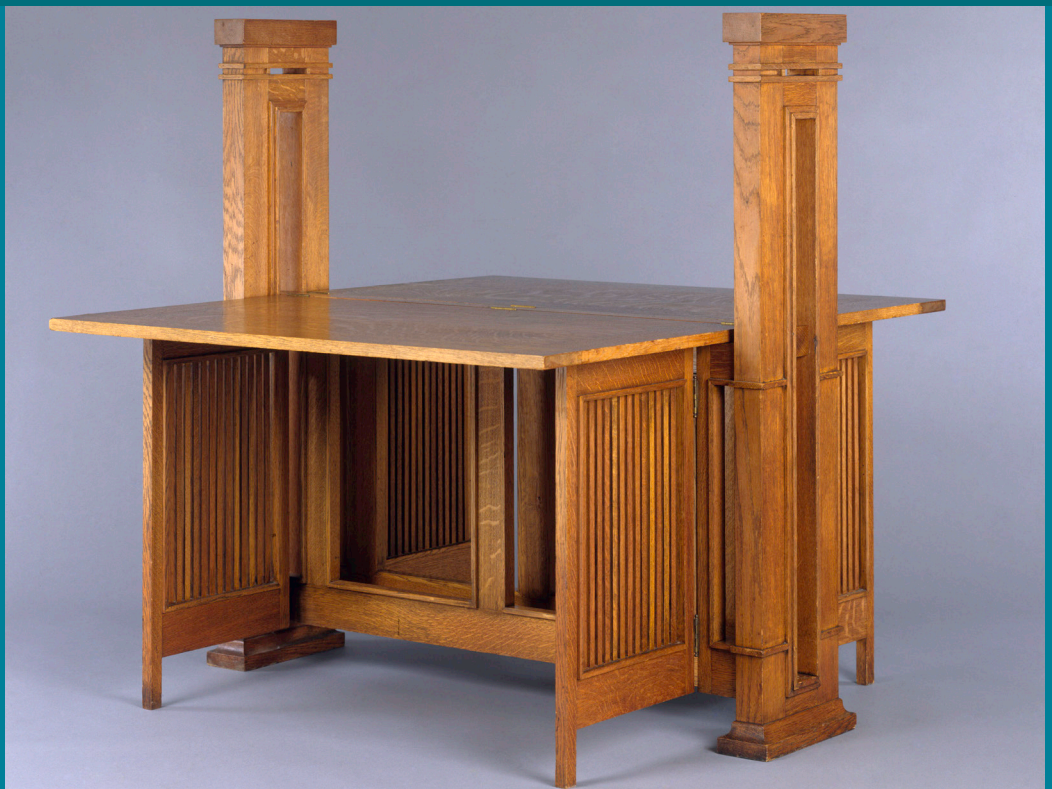

Commercial health plans' early responses to the federal parity law

Opening Doors to Recovery in Georgia: effects on recidivism

Understanding the social determinants of mental health

Evidence-based practices and the critical role of financing

AMERICAN  
**PSYCHIATRIC**  
ASSOCIATION

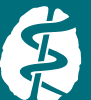

[ps.psychiatryonline.org](http://ps.psychiatryonline.org)
