# There's So Much More to PSYCHIATRIC SERVICES Than Meets the Page!

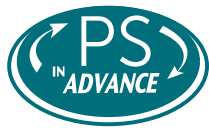

## Psychiatric Services in Advance

### Latest research reports!

#### High Rates of Opioid Prescribing in Oregon Medicaid

The top 10% of users and prescribers accounted for more than 80% of prescribed opioids. Targeting this pattern may prove more beneficial than broad-based policies.

#### SAFE VET Intervention for Suicidal Veterans

SAFE VET, which combines safety planning and telephone follow-up, was tested in the emergency departments of five VA medical centers. It reduced further suicidal behavior and fostered treatment engagement.

### Revisit the field's rich history!

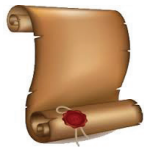

#### 50 Years Ago in *Psychiatric Services*

- Preparing the Community for a CMHC
- A State Hospital Vocational Rehab Center
- Making the Most of Our Manpower

AMERICAN  
PSYCHIATRIC  
ASSOCIATION  
PUBLISHING

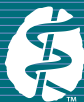

[ps.psychiatryonline.org](http://ps.psychiatryonline.org)

[www.appi.org](http://www.appi.org) • 1-800-368-5777 • Fax: 703-907-1091 • Email: [appi@psych.org](mailto:appi@psych.org) Priority Code AH1520

## Special Discounts for American Psychiatric Association members on [www.appi.org](http://www.appi.org)

**20% Discount for APA Members**

**25% Discount for  
APA Resident-Fellow Members**

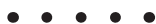

### Subscribe to APP News

for the latest information on new titles, special offers,  
and other useful information.

Sign up @ [www.appi.org](http://www.appi.org)

AMERICAN  
PSYCHIATRIC  
ASSOCIATION  
PUBLISHING

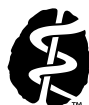

[www.appi.org](http://www.appi.org) Email: [appi@psych.org](mailto:appi@psych.org) Phone: 1-800-368-5777

AH1506N

*Psychiatric Services* (ISSN  
1075-2730; online version,  
1557-9700) is published  
monthly by the American  
Psychiatric Association, edito-  
rial and executive office, 1000  
Wilson Blvd., Suite 1825, Arling-  
ton, VA 22209-3901. Copyright  
© 2016 by the American  
Psychiatric Association. Printed  
in U.S.A. Periodicals postage  
paid at Arlington, VA, and at  
additional mailing offices.  
POSTMASTER: Send address  
changes to *Psychiatric  
Services*, 1000 Wilson Blvd.,  
Suite 1825, Arlington, VA  
22209-3901.

# Understanding Mental Disorders

## Your Guide to DSM-5®

American Psychiatric Association

**A consumer guide for anyone who has been touched by mental illness!**

***Understanding Mental Disorders: Your Guide to DSM-5®*** is a vital resource for anyone who has been touched by mental illness.

Most of us know someone who suffers from a mental illness. This book helps those who may be struggling with mental health problems, as well as those who want to help others achieve mental health and well-being.

Based on the latest, fifth edition of the *Diagnostic and Statistical Manual of Mental Disorders*—known as DSM-5®—***Understanding Mental Disorders*** provides valuable insight on what to expect from an illness and its treatment—and will help readers recognize symptoms, know when to seek help, and get the right care. Featured disorders include depression, schizophrenia, ADHD, autism spectrum disorder, posttraumatic stress disorder, and bipolar disorder, among others.

The common language for diagnosing mental illness used in DSM-5® for mental health professionals has been adapted into clear, concise descriptions of disorders for nonexperts. In addition to specific symptoms for each disorder, readers will find:

- Risk factors and warning signs
- Related disorders
- Ways to cope
- Tips to promote mental health
- Personal stories
- Key points about the disorders and treatment options
- A special chapter dedicated to treatment essentials and ways to get help
- Helpful resources that include a glossary, list of medications and support groups

For more resources and information, go to [www.psychiatry.org/UnderstandingMentalDisorders](http://www.psychiatry.org/UnderstandingMentalDisorders)

2015 • 370 pages • ISBN 978-1-58562-491-1 • Paperback • \$24.95 • Item #62491

**Just  
Published!**

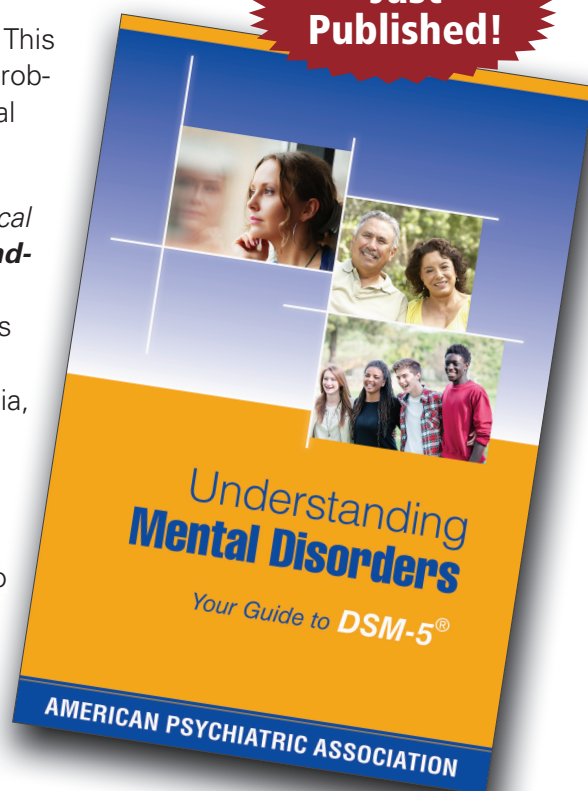

**With Foreword by  
Patrick J. Kennedy**

AMERICAN  
PSYCHIATRIC  
ASSOCIATION  
PUBLISHING

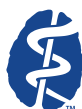

Order Online: [www.appi.org](http://www.appi.org)

Phone: 703-907-7322 • Toll Free: 1-800-368-5777

Email: [appi@psych.org](mailto:appi@psych.org)

20% Discount for American Psychiatric  
Association Members

25% Discount for APA Resident-Fellow Members AH1512R

# JobCentral

## The Career Hub for Psychiatry

Filling an open position?

Searching for that ideal job?

Get started at [jobs.psychiatry.org](https://jobs.psychiatry.org)

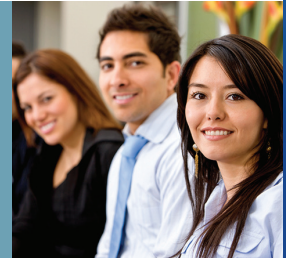

### Manage Your Career

- Search for psychiatry jobs by position, title, specialty, work setting, location, and key words to access relevant jobs.
- Create an account to save jobs, store multiple resumes and cover letters, communicate with employers through our internal messaging system, and more through an engaging interface.
- Set up multiple job alerts specifying your skills, interests and location to receive an e-mail when an employer posts a job that matches your criteria.

### Recruit for Open Positions

- Post your job in front of over 27,000 highly qualified psychiatrists.
- Cross promote your job listing in *Psychiatric News*.
- Search the anonymous resume database to find your ideal candidate.

[jobs.psychiatry.org](https://jobs.psychiatry.org)

AMERICAN  
PSYCHIATRIC  
ASSOCIATION

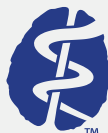

**JOBCENTRAL**  
The Career Hub for Psychiatry
