# The Social Determinants of Mental Health

Edited by Michael T. Compton, M.D., M.P.H., and  
Ruth S. Shim, M.D., M.P.H.

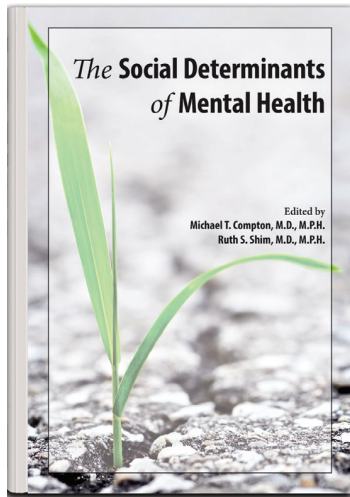

This book provides a foundation of knowledge on the social and environmental underpinnings of mental health and mental illnesses for clinical and policy decision making, with a goal to improve the mental health of individuals across diverse communities and the mental health of the nation as a whole. The basic premise of this book is that society plays a prominent role in creating and shaping mental illnesses and thus is in a position to improve mental health and reduce risk for mental illnesses. Where an individual, family, community, or society is located on the continuum from health and wellness to illness and infirmity is multidetermined. Although genetic influences and biological factors are key drivers of health and wellness, the contexts of the individual, family, community, and society are also crucial.

*The Social Determinants of Mental Health* provides psychiatrists, psychologists, residents, medical students, policymakers, and allied mental health professionals with practical information in an accessible format for incorporating social and environmental determinants of mental health into practice and policy decision making, empowering them to act to build a culture of positive mental health and wellness.

Students preparing for the Medical College Admission Test (MCAT) will also benefit from this book, as the MCAT in 2015 will test applicants' knowledge of the social determinants of health. The social determinants of mental health are not distinct from the social determinants of physical health, although they deserve special emphasis given the prevalence and burden of poor mental health.

2015 • 294 pages • ISBN 978-1-58562-477-5 • Paperback • \$59.00 • Item #62477

2015 • 294 pages • ISBN 978-1-58562-517-8 • eBook • \$47.00 • Item #62517

**20% Discount for American Psychiatric Association Members**

**25% Discount for APA Resident-Fellow Members**

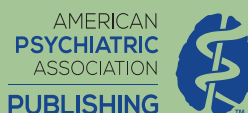

Order Online: [www.appi.org](http://www.appi.org)

Phone: 703-907-7322 • Toll Free: 1-800-368-5777

Email: [appi@psych.org](mailto:appi@psych.org)

Just Published!

American Psychiatric Association Publishing

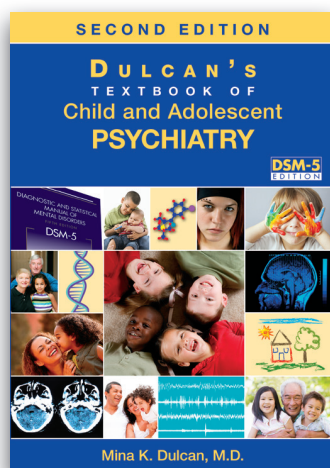

## Dulcan's Textbook of Child and Adolescent Psychiatry, Second Edition

Edited by Mina K. Dulcan, M.D.

This thoroughly updated and more compact edition of *Dulcan's Textbook of Child and Adolescent Psychiatry* is designed to be used as a core textbook for child and adolescent psychiatry fellowship training as well as a reference for practicing child and adolescent psychiatrists, pediatricians, family physicians, advanced practice nurses, psychologists, psychiatric social workers, and others. The first text of its kind to be DSM-5 compatible, it provides current diagnostic information for the mental health clinician in training or the practicing clinician seeking an update. Each chapter highlights what we know about evidence-based practices in assessment and treatment, covering the

most important topics in an improved, more efficient format.

Each chapter concludes with summary points and references, to consolidate learning and provide sources for those who wish to learn more. *Dulcan's Textbook of Child and Adolescent Psychiatry*, 2nd Edition, is both a classic reference and the most current comprehensive text.

2016 • 1205 pages • ISBN 978-1-58562-493-5 • Hardcover • \$225.00 • Item #62493

2016 • 1205 pages • ISBN 978-1-61537-020-7 • eBook • \$180.00 • Item #37020

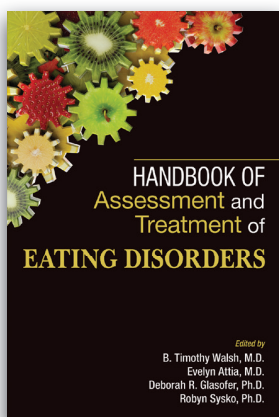

## Handbook of Assessment and Treatment of Eating Disorders

Edited by B. Timothy Walsh, M.D., Evelyn Attia, M.D.,  
Deborah R. Glasofer, Ph.D., and Robyn Sysko, Ph.D.

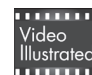

### Video Illustrated!

The recent publication of the revised *Diagnostic and Statistical Manual of Mental Disorders* (DSM-5) has had a profound impact on the classification of eating disorders, introducing changes that were formalized after years of study by the Eating Disorders Work Group. The *Handbook of Assessment and Treatment of Eating Disorders*

is the only book that provides clinicians with everything they need to know to implement these changes in assessment, diagnosis, and treatment. Chapters on assessment and treatment, along with accompanying videos, offer comprehensive, state-of-the-art coverage that will benefit clinicians in practice, such as psychiatrists and psychotherapists, as well as mental health trainees.

2016 • 358 pages • ISBN 978-1-58562-509-3 • Paperback • \$59.00 • Item #62509

2016 • 358 pages • ISBN 978-1-61537-039-9 • eBook • \$47.00 • Item #37039

Order Now

[www.appi.org](http://www.appi.org)

AMERICAN  
PSYCHIATRIC  
ASSOCIATION  
PUBLISHING

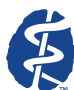

[www.appi.org](http://www.appi.org)

Email: [appi@psych.org](mailto:appi@psych.org)

Toll Free: 1-800-368-5777

20% Discount for American Psychiatric Association Members

25% Discount for APA Resident-Fellow Members

Please use Priority Code AH1554 when ordering. Find us on [f](#) and [t](#).

# The DSM-5 Collection

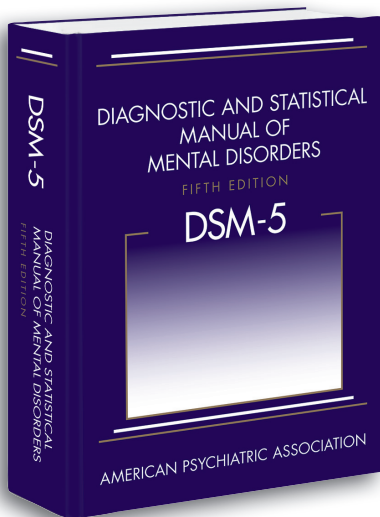

## Diagnostic and Statistical Manual of Mental Disorders, Fifth Edition (DSM-5®)

American Psychiatric Association

This new edition of *Diagnostic and Statistical Manual of Mental Disorders* (DSM-5®), used by clinicians and researchers to diagnose and classify mental disorders, is the product of more than 10 years of effort by hundreds of international experts in all aspects of mental health. Their dedication and hard work have yielded an authoritative volume that defines and classifies mental disorders in order to improve diagnosis, treatment, and research.

The criteria are concise and explicit, intended to facilitate an objective assessment of symptom presentations in a variety of clinical settings—inpatient, outpatient, partial hospital, consultation-liaison, clinical, private practice, and primary care.

- The latest findings in neuroimaging and genetics have been integrated into each disorder along with gender and cultural considerations.
- The revised organizational structure recognizes symptoms that span multiple diagnostic categories, providing new clinical insights in diagnosis.

- Both ICD-9-CM and ICD-10-CM codes are included for each disorder.

The *Diagnostic and Statistical Manual of Mental Disorders*, Fifth Edition, is the most comprehensive, current, and critical resource for clinical practice available to today's mental health professionals.

2013 • 991 pages • ISBN 978-0-89042-554-1 • Hardcover • \$205.00 • Item #2554

2013 • 991 pages • ISBN 978-0-89042-555-8 • Paperback • \$155.00 • Item #2555

2013 • 991 pages • ISBN 978-0-89042-557-2 • eBook • \$124.00 • Item #2557

**DSM-5**  
COLLECTION

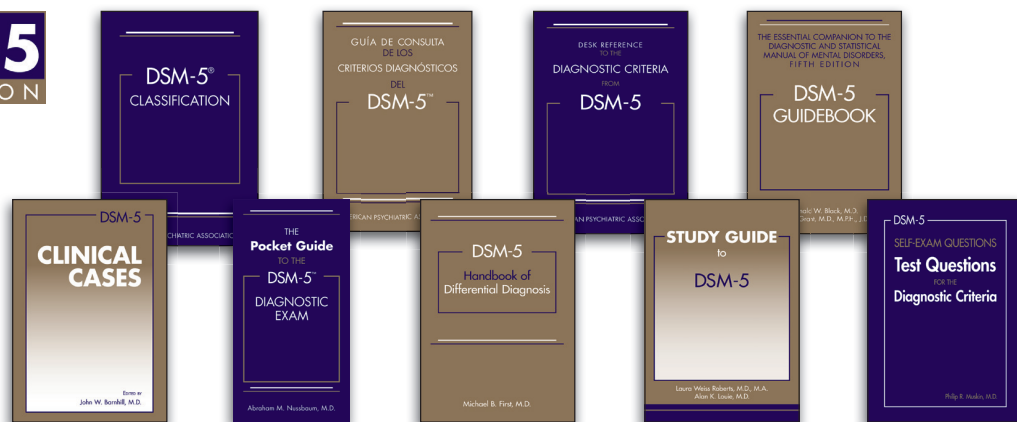

AMERICAN  
PSYCHIATRIC  
ASSOCIATION  
PUBLISHING

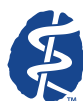

Order Online: [www.appi.org](http://www.appi.org)  
Phone: 703-907-7322  
Toll Free: 1-800-368-5777  
Email: [appi@psych.org](mailto:appi@psych.org)

20% Discount for American Psychiatric Association Members

25% Discount for APA Resident-Fellow Members AH1552A
